# Supplementary material
Source: PubMed Central journal article supplement (PMC3646564)

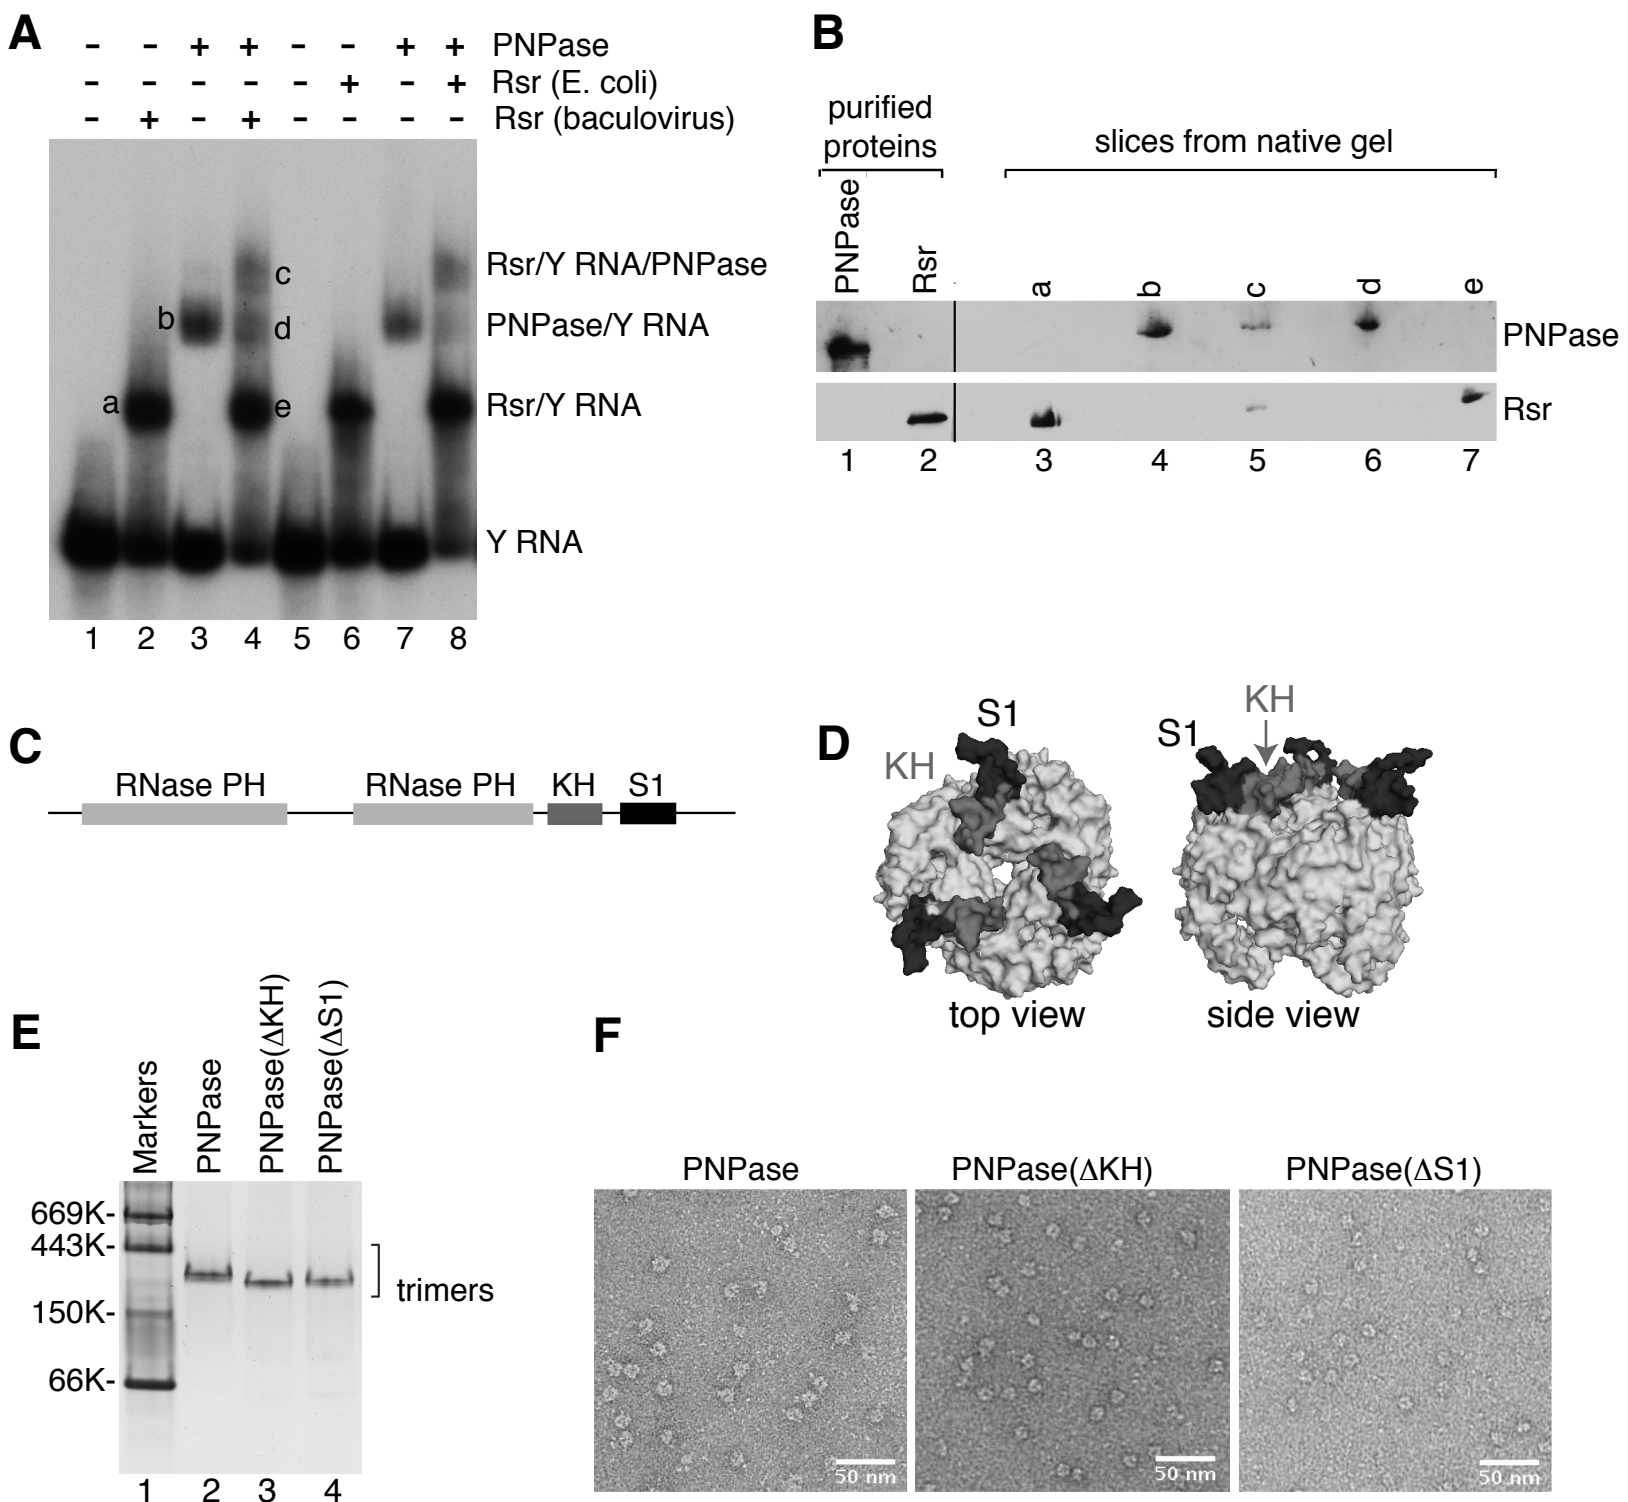

Figure S1  
Chen et al.



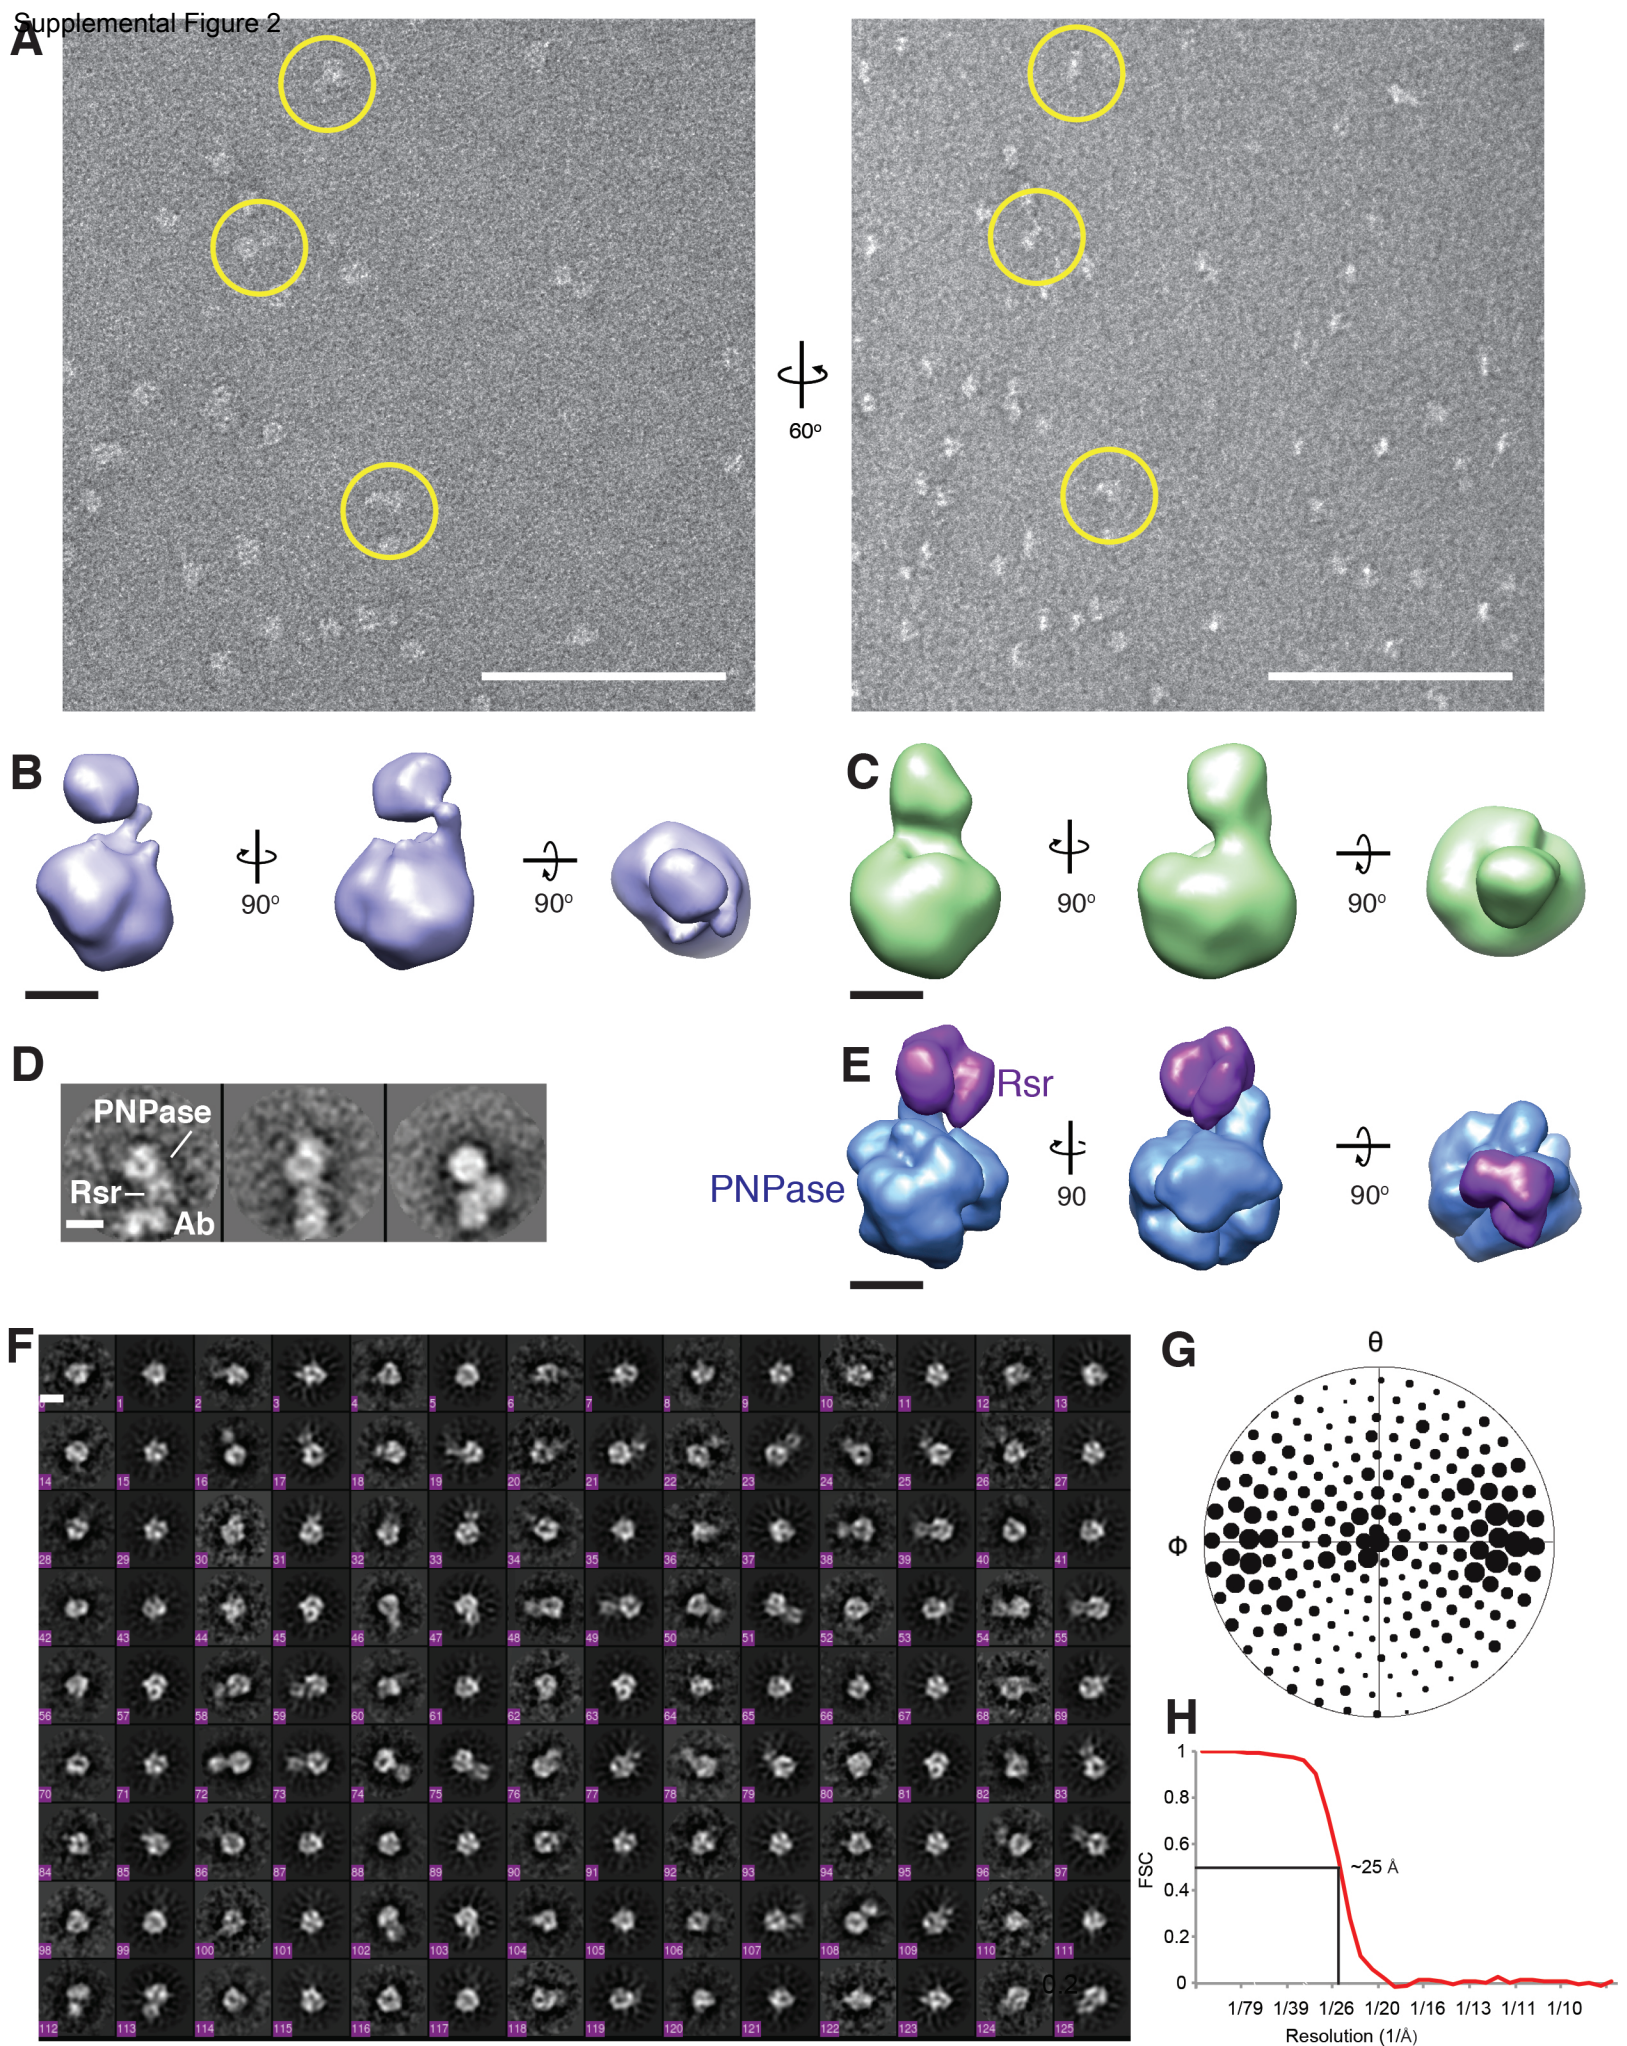





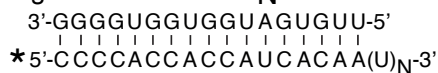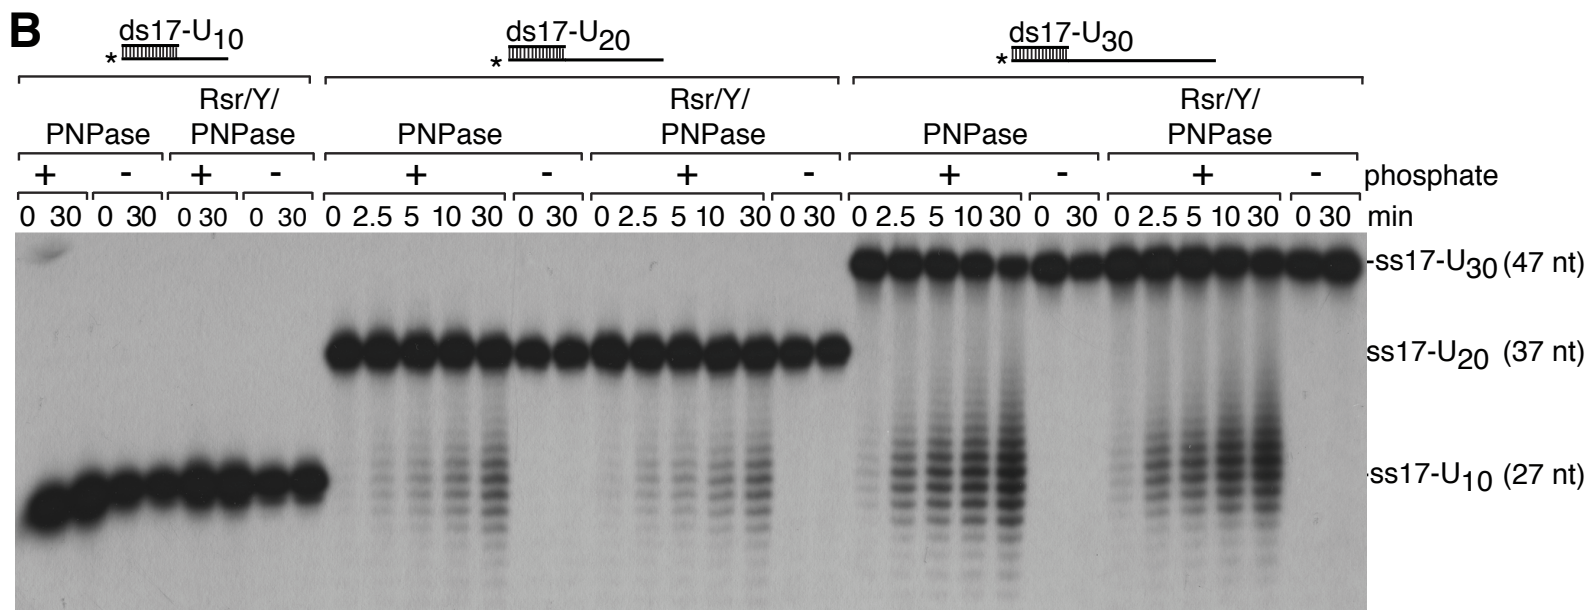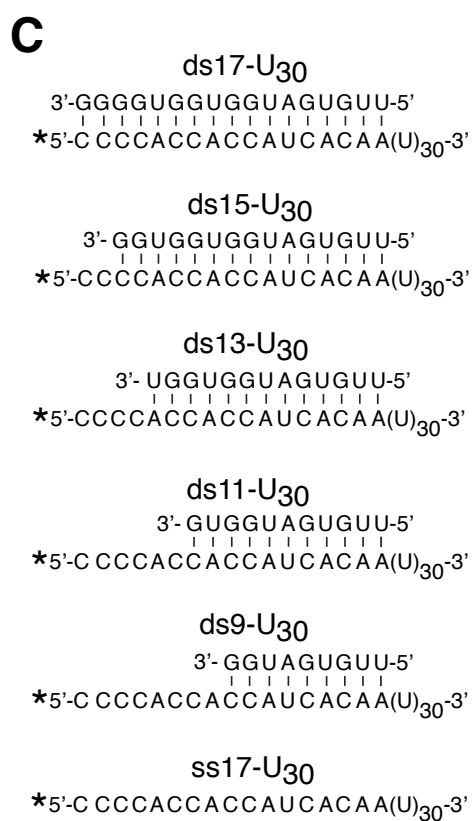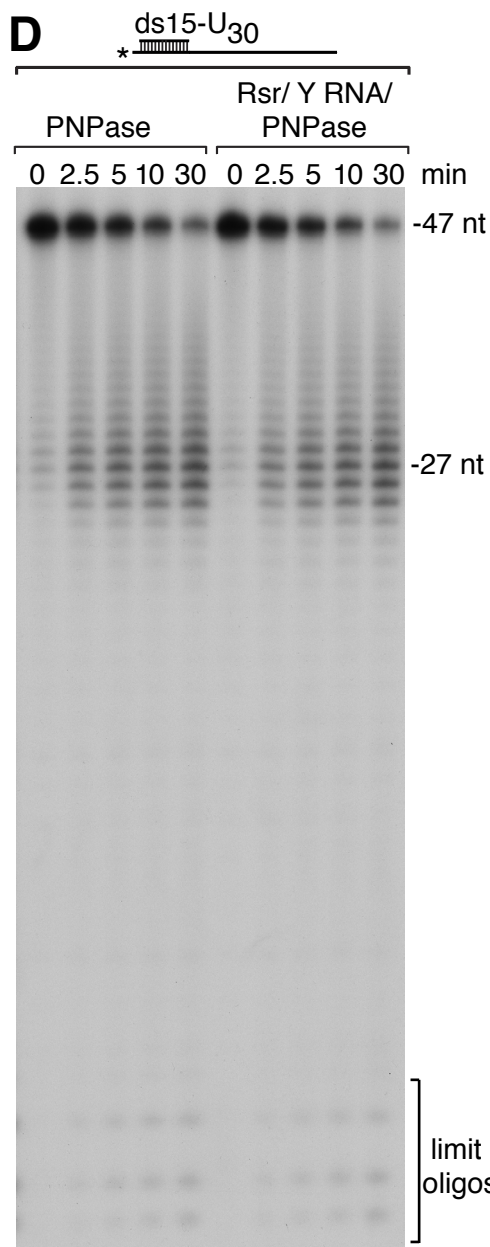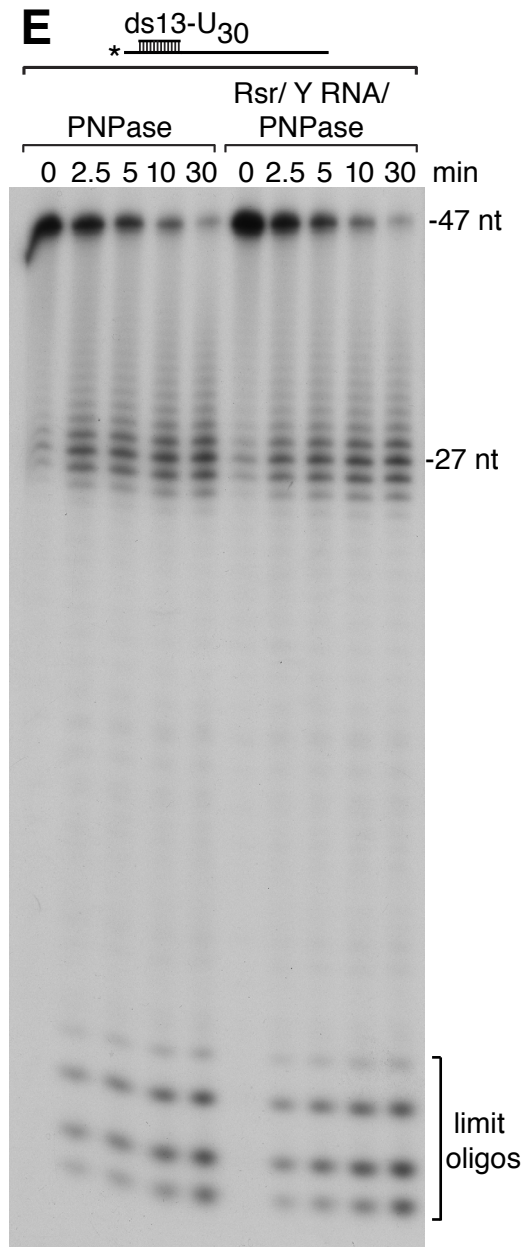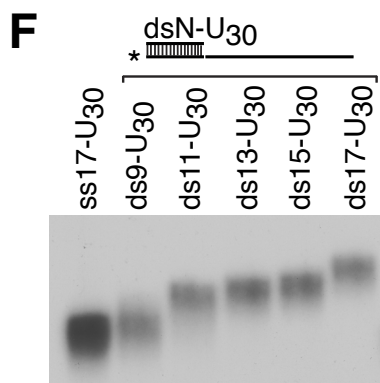



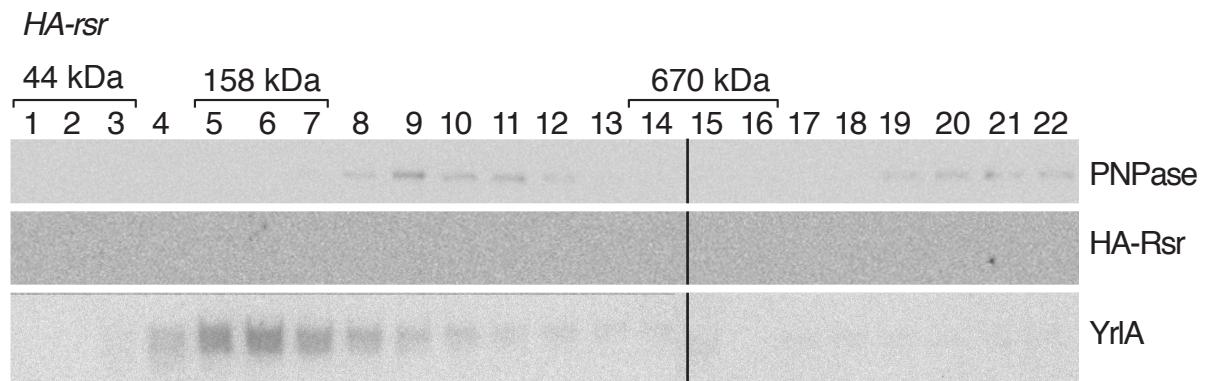

Figure S5  
Chen et al.

Supplement: NIHMS449660-supplement-02.pdf [file NIHMS449660-supplement-02.pdf]
